# Supplementary material
Source: PubMed Central journal article supplement (PMC11069347)
Supplement: NIHMS1982053-supplement-Supplementary_Material.pdf [file NIHMS1982053-supplement-Supplementary_Material.pdf]

## **Supplemental Materials**

**Supplemental Table 1:** Round 1 Survey Questions and Statements

**Supplemental Table 2:** Round 2 Survey Questions and Statements

**Supplemental Table 3:** Solutions Used for Replacement Fluid

**Supplemental Table 4:** Solutions Used for Dialysate Fluid

**Supplemental Table 1: Round 1 Survey Questions and Statements**

| <b>Question or Statement</b>                                                                                               | <b>Response Options</b>                                                                                         |
|----------------------------------------------------------------------------------------------------------------------------|-----------------------------------------------------------------------------------------------------------------|
| Where is the primary location that you prescribe CKRT?                                                                     | Asia<br>Canada<br>Caribbean<br>Central America<br>Europe<br>Mexico<br>Oceania<br>South America<br>United States |
| What is your primary profession?                                                                                           | Physician<br>Physician Assistant<br>Nurse Practitioner                                                          |
| What is your primary specialty?                                                                                            | Critical Care Medicine<br>Nephrology<br>Cardiology<br>Neonatology                                               |
| What is your secondary specialty?                                                                                          | Critical Care Medicine<br>Nephrology<br>Cardiology<br>Neonatology<br>Not applicable                             |
| How many years have you worked in your current profession (excluding trainee time)?                                        | 0-5<br>6-10<br>11-15<br>16-20<br>>20                                                                            |
| At your institution CKRT orders are placed by:                                                                             | Critical Care Medicine<br>Nephrology<br>Cardiology<br>Neonatology<br>A combination of the above specialties     |
| I start patients on CKRT after they reach a positive fluid balance $\geq 10\%$ in the absence of any other indications.    | Always<br>Sometimes<br>Never                                                                                    |
| I start patients on CKRT after they reach a positive fluid balance $\geq 15\%$ in the absence of any other indications.    | Always<br>Sometimes<br>Never                                                                                    |
| I start patients on CKRT after they reach a positive fluid balance $\geq 20\%$ in the absence of any other indications.    | Always<br>Sometimes<br>Never                                                                                    |
| I start CKRT in a patient with a serum creatinine 2-2.9 times baseline or greater in the absence of any other indications. | Always<br>Sometimes<br>Never                                                                                    |

|                                                                                                                                  |                              |
|----------------------------------------------------------------------------------------------------------------------------------|------------------------------|
| I start CKRT in a patient with urine output < 0.5 ml/kg/hour for $\geq$ 12 hours in the absence of any other indications.        | Always<br>Sometimes<br>Never |
| I start CKRT in a patient with a serum creatinine that is 3 times baseline or greater in the absence of any other indications.   | Always<br>Sometimes<br>Never |
| I start CKRT in a patient with a decrease in eGFR to <35 ml/min per 1.73 m <sup>2</sup> in the absence of any other indications. | Always<br>Sometimes<br>Never |
| I start CKRT in a patient with a urine output < 0.3 ml/kg/hour for $\geq$ 24 hours in the absence of any other indications.      | Always<br>Sometimes<br>Never |
| I prescribe dialytic dose using body surface area.                                                                               | Always<br>Sometimes<br>Never |
| I prescribe dialytic dose using weight.                                                                                          | Always<br>Sometimes<br>Never |
| I use the admission weight of the patient when dosing based on weight or body surface area.                                      | Always<br>Sometimes<br>Never |
| I use the ideal body weight of the patient when dosing based on weight or body surface area.                                     | Always<br>Sometimes<br>Never |
| I use the current weight of the patient when dosing based on weight or body surface area.                                        | Always<br>Sometimes<br>Never |
| If I index dialytic dose to body surface area, I aim for a clearance of 2 L/hour/1.73 m <sup>2</sup> .                           | Always<br>Sometimes<br>Never |
| If I index patient dialytic dose to weight, I aim for a clearance of 20-30 ml/kg/hour.                                           | Always<br>Sometimes<br>Never |
| I use continuous venovenous hemofiltration (CVVH) as a mode of CKRT.                                                             | Always<br>Sometimes<br>Never |
| I use continuous venovenous hemodialysis (CVVHD) as a mode of CKRT.                                                              | Always<br>Sometimes<br>Never |
| I use continuous venovenous hemodiafiltration (CVVHDF) as a mode of CKRT.                                                        | Always<br>Sometimes<br>Never |
| I use slow continuous ultrafiltration (SCUF) as a mode of CKRT.                                                                  | Always<br>Sometimes<br>Never |

|                                                                                                               |                              |
|---------------------------------------------------------------------------------------------------------------|------------------------------|
| I use CKRT rather than intermittent hemodialysis for hyperammonemia.                                          | Always<br>Sometimes<br>Never |
| I use customizable CKRT solutions.                                                                            | Always<br>Sometimes<br>Never |
| I change the hemofilter after 72 hours of therapy.                                                            | Always<br>Sometimes<br>Never |
| I prescribe CKRT for patients $\leq 10$ kg.                                                                   | Always<br>Sometimes<br>Never |
| I prescribe a blood prime when an extracorporeal circuit exceeds 10% of a patient's circulating blood volume. | Always<br>Sometimes<br>Never |
| I use citrate as a regional anticoagulant for CKRT.                                                           | Always<br>Sometimes<br>Never |
| I use systemic heparin as an anticoagulant for CKRT.                                                          | Always<br>Sometimes<br>Never |
| I use prostacyclin as an anticoagulant for CKRT.                                                              | Always<br>Sometimes<br>Never |
| I use citrate as a regional anticoagulant in patients with liver failure.                                     | Always<br>Sometimes<br>Never |
| I begin removing fluid in the first hour of CKRT.                                                             | Always<br>Sometimes<br>Never |
| I base my maximum fluid removal goal on the patient's total blood volume.                                     | Always<br>Sometimes<br>Never |
| I assess fluid removal goals at least every 24 hours.                                                         | Always<br>Sometimes<br>Never |
| I assess fluid removal goals at least every 12 hours.                                                         | Always<br>Sometimes<br>Never |
| I assess fluid removal goals at least every 6 hours.                                                          | Always<br>Sometimes<br>Never |
| I assess fluid removal goals at least every 4 hours.                                                          | Always<br>Sometimes<br>Never |

|                                                                                                                     |                              |
|---------------------------------------------------------------------------------------------------------------------|------------------------------|
| At my center goals for fluid removal are determined primarily by the critical care medicine team.                   | Always<br>Sometimes<br>Never |
| At my center goals for fluid removal are determined primary by the nephrology team.                                 | Always<br>Sometimes<br>Never |
| At my center goals for fluid removal are determined by the critical care and nephrology teams together.             | Always<br>Sometimes<br>Never |
| I monitor filtration fraction.                                                                                      | Always<br>Sometimes<br>Never |
| My primary consideration when deciding to initiate net ultrafiltration is hemodynamic status.                       | Always<br>Sometimes<br>Never |
| My primary consideration when deciding to initiate net ultrafiltration is fluid balance.                            | Always<br>Sometimes<br>Never |
| I achieve my goal net ultrafiltration rate by varying ultrafiltration rate only.                                    | Always<br>Sometimes<br>Never |
| I achieve my goal net ultrafiltration rate by varying replacement fluid rate only.                                  | Always<br>Sometimes<br>Never |
| I achieve my goal net ultrafiltration rate by varying both the ultrafiltration rate and the replacement fluid rate. | Always<br>Sometimes<br>Never |
| What is your starting CKRT dose?                                                                                    | Free Text                    |
| Do you modify the dose? If so, for what indication?                                                                 | Free Text                    |
| Do you monitor dose delivered?                                                                                      | Free Text                    |
| If you dose CKRT based on body surface area, how do you typically dose?                                             | Free Text                    |
| If you dose CKRT in ml/kg/hr, how do you typically dose?                                                            | Free Text                    |
| What solution is used for replacement fluid at your center?                                                         | Free Text                    |
| What solution is used for dialysate fluid at your center?                                                           | Free Text                    |
| What is the most common anticoagulant used for CKRT at your center and why?                                         | Free Text                    |
| If you monitor filtration fraction, what value do you target?                                                       | Free Text                    |

|                                                                                                                        |           |
|------------------------------------------------------------------------------------------------------------------------|-----------|
| When prescribing CVVH, do you routinely administer replacement fluid pre-dilution or post-dilution?                    | Free Text |
| What coagulation parameters do you follow for heparin anticoagulation while on CKRT and what are your typical targets? | Free Text |
| What is machine brand do you currently use to dialyze patients $\leq$ 10 kg?                                           | Free Text |
| What is your most common intervention for when hemodynamic instability occurs during net ultrafiltration?              | Free Text |
| Do you have a maximum net ultrafiltration rate in ml/kg/hr?                                                            | Free Text |

CKRT Continuous Kidney Replacement Therapy

**Supplemental Table 2: Round 2 Survey Questions and Statements**

| Question or Statement                                                               | Response Options                                                                                                |
|-------------------------------------------------------------------------------------|-----------------------------------------------------------------------------------------------------------------|
| Where is the primary location that you prescribe CKRT?                              | Asia<br>Canada<br>Caribbean<br>Central America<br>Europe<br>Mexico<br>Oceania<br>South America<br>United States |
| What is your primary profession?                                                    | Physician<br>Physician Assistant<br>Nurse Practitioner                                                          |
| What is your primary specialty?                                                     | Critical Care Medicine<br>Nephrology<br>Cardiology<br>Neonatology                                               |
| What is your secondary specialty?                                                   | Critical Care Medicine<br>Nephrology<br>Cardiology<br>Neonatology<br>Not applicable                             |
| How many years have you worked in your current profession (excluding trainee time)? | 0-5<br>6-10<br>11-15<br>16-20<br>>20                                                                            |
| At your institution CKRT orders are placed by:                                      | Critical Care Medicine<br>Nephrology                                                                            |

|                                                                                                                               |                                                                     |
|-------------------------------------------------------------------------------------------------------------------------------|---------------------------------------------------------------------|
|                                                                                                                               | Cardiology<br>Neonatology<br>A combination of the above specialties |
| I start patients on CKRT after they reach a positive fluid balance $\geq 10\%$ in the absence of any other indications.       | Always<br>Sometimes<br>Never                                        |
| I start patients on CKRT after they reach a positive fluid balance $\geq 15\%$ in the absence of any other indications.       | Always<br>Sometimes<br>Never                                        |
| I start patients on CKRT after they reach a positive fluid balance $\geq 20\%$ in the absence of any other indications.       | Always<br>Sometimes<br>Never                                        |
| I start CKRT in a patient with a urine output $< 0.3$ ml/kg/hour for $\geq 24$ hours in the absence of any other indications. | Always<br>Sometimes<br>Never                                        |
| I prescribe dialytic dose using body surface area.                                                                            | Always<br>Sometimes<br>Never                                        |
| I use the admission weight of the patient when dosing based on weight or body surface area.                                   | Always<br>Sometimes<br>Never                                        |
| I use the ideal body weight of the patient when dosing based on weight or body surface area.                                  | Always<br>Sometimes<br>Never                                        |
| If I index dialytic dose to body surface area, I aim for a clearance of 2 L/hour/1.73 m <sup>2</sup> .                        | Always<br>Sometimes<br>Never                                        |
| If I index patient dialytic dose to weight, I aim for a clearance of 20-45 ml/kg/hour.                                        | Always<br>Sometimes<br>Never                                        |
| I modify my standard starting CKRT dialytic dose if I am treating a patient with hyperammonemia.                              | Always<br>Sometimes<br>Never                                        |
| I modify my standard starting CKRT dialytic dose if I am treating a patient for drug intoxication.                            | Always<br>Sometimes<br>Never                                        |
| I modify my standard starting CKRT dialytic dose if I am treating a patient with citrate accumulation.                        | Always<br>Sometimes<br>Never                                        |
| I measure delivered CKRT dose based on blood and effluent concentrations of urea nitrogen.                                    | Always<br>Sometimes<br>Never                                        |
| I use continuous venovenous hemodiafiltration (CVVHDF) as a mode of CKRT.                                                     | Always<br>Sometimes<br>Never                                        |

|                                                                                                               |                              |
|---------------------------------------------------------------------------------------------------------------|------------------------------|
| I use CKRT rather than intermittent hemodialysis for hyperammonemia.                                          | Always<br>Sometimes<br>Never |
| I change the hemofilter after 72 hours of therapy.                                                            | Always<br>Sometimes<br>Never |
| I prescribe CKRT for patients $\leq 10$ kg.                                                                   | Always<br>Sometimes<br>Never |
| I prescribe a blood prime when an extracorporeal circuit exceeds 10% of a patient's circulating blood volume. | Always<br>Sometimes<br>Never |
| I use citrate as a regional anticoagulant for CKRT.                                                           | Always<br>Sometimes<br>Never |
| I use heparin as an anticoagulant for CKRT.                                                                   | Always<br>Sometimes<br>Never |
| I use citrate as a regional anticoagulant in patients with liver failure.                                     | Always<br>Sometimes<br>Never |
| When I use heparin for anticoagulation on CKRT I follow ACT values.                                           | Always<br>Sometimes<br>Never |
| When I use heparin for anticoagulation on CKRT I follow PTT values.                                           | Always<br>Sometimes<br>Never |
| When I use heparin for anticoagulation on CKRT I follow Anti-Xa values.                                       | Always<br>Sometimes<br>Never |
| I begin removing fluid in the first hour of CKRT.                                                             | Always<br>Sometimes<br>Never |
| I assess fluid removal goals at least every 24 hours.                                                         | Always<br>Sometimes<br>Never |
| I assess fluid removal goals at least every 12 hours.                                                         | Always<br>Sometimes<br>Never |
| I assess fluid removal goals at least every 6 hours.                                                          | Always<br>Sometimes<br>Never |
| At my center goals for fluid removal are determined primarily by the critical care medicine team.             | Always<br>Sometimes<br>Never |



|                                                                                                                                      |                              |
|--------------------------------------------------------------------------------------------------------------------------------------|------------------------------|
| At my center goals for fluid removal are determined by the critical care and nephrology teams together.                              | Always<br>Sometimes<br>Never |
| I monitor filtration fraction.                                                                                                       | Always<br>Sometimes<br>Never |
| My primary consideration when deciding to initiate net ultrafiltration is hemodynamic status.                                        | Always<br>Sometimes<br>Never |
| My primary consideration when deciding to initiate net ultrafiltration is fluid balance.                                             | Always<br>Sometimes<br>Never |
| I achieve my goal net ultrafiltration rate by varying ultrafiltration rate only.                                                     | Always<br>Sometimes<br>Never |
| When calculating net ultrafiltration rate, I account for enteral intake.                                                             | Always<br>Sometimes<br>Never |
| When hemodynamic instability occurs on CKRT my first intervention or recommended intervention is to reduce the ultrafiltration rate. | Always<br>Sometimes<br>Never |
| When hemodynamic instability occurs on CKRT my first intervention or recommended intervention is to start a vasoactive agent.        | Always<br>Sometimes<br>Never |
| When hemodynamic instability occurs on CKRT my first intervention or recommended intervention is to provide a bolus of fluid.        | Always<br>Sometimes<br>Never |
| The machine that I use for CKRT in patients $\leq 10$ kg is The Cardio-Renal Pediatric Dialysis Emergency Machine (CARPEDIEM).       | Always<br>Sometimes<br>Never |
| The machine that I use for CKRT in patients $\leq 10$ kg is The Prismaflex System.                                                   | Always<br>Sometimes<br>Never |
| The machine that I use for CKRT in patients $\leq 10$ kg is The Aquadex SmartFlow System.                                            | Always<br>Sometimes<br>Never |
| How do you monitor dose delivered during CKRT?                                                                                       | Free Text                    |
| What do you consider to be an unsafe amount of hourly ultrafiltration?                                                               | Free Text                    |
| Do you have a quality monitoring program for CKRT at your institution?                                                               | Free Text                    |

**Supplemental Table 3: Solutions Used for Replacement Fluid**

| <b>Solution</b> | <b>N (%) of 147 Responses</b> |
|-----------------|-------------------------------|
| Primasol        | 33 (22.4)                     |
| Primasate       | 11 (7.5)                      |
| Phoxillum       | 30 (20.4)                     |
| Hemosol         | 1 (0.7)                       |
| Aquasol         | 1 (0.7)                       |
| Duosol          | 5 (3.4)                       |
| Normal Saline   | 2 (1.4)                       |
| Dianeal         | 1 (0.7)                       |
| Byphozyl        | 1 (0.7)                       |
| Prismocal       | 2 (1.4)                       |
| Regiocit        | 2 (1.4)                       |
| NxtStage RFP    | 2 (1.4)                       |
| Not Applicable  | 56 (38.1)                     |

**Supplemental Table 4: Solutions Used for Dialysate Fluid**

| <b>Solution</b> | <b>N (%) out of 147 Responses</b> |
|-----------------|-----------------------------------|
| Primasol        | 33 (22.4)                         |
| Primasate       | 21 (14.3)                         |
| Phoxillum       | 22 (15.0)                         |
| Hemosol         | 3 (2.0)                           |
| Aquasol         | 1 (0.7)                           |
| Duosol          | 5 (3.4)                           |
| Dianeal         | 1 (0.7)                           |
| Byphozyl        | 3 (2.0)                           |
| Prismocal       | 3 (2.0)                           |
| NxtStage RFP    | 3 (2.0)                           |
| Not Applicable  | 52 (35.4)                         |
